# Supplementary material for: PNPLA3 I148M Up-Regulates Hedgehog and Yap Signaling in Human Hepatic Stellate Cells
Source: PubMed Central journal article supplement (PMC7698885; doi:10.3390/ijms21228711), 2020-11-18
Supplement: ijms-21-08711-s001.pdf [file ijms-21-08711-s001.pdf]

# PNPLA3 I148M Up-Regulates Hedgehog and Yap Signaling in Human Hepatic Stellate Cells

Francesca Virginia Bruschi <sup>1</sup>, Matteo Tardelli <sup>1,2</sup>, Elisa Einwallner <sup>3</sup>, Thierry Claudel <sup>1</sup> and Michael Trauner <sup>1,\*</sup>

<sup>1</sup> Hans Popper Laboratory of Molecular Hepatology, Division of Gastroenterology and Hepatology, Department of Internal Medicine III, Medical University of Vienna, Vienna 1090, Austria; francesca\_bruschi@yahoo.it (F.V.B.); mat4005@med.cornell.edu (M.T.); thierry.claudel@meduniwien.ac.at (T.C.)

<sup>2</sup> Division of Gastroenterology and Hepatology, Joan and Sanford I. Weill Cornell Department of Medicine, Weill Cornell Medical College, New York, NY 10021, USA

<sup>3</sup> Department of Laboratory Medicine, Center of Translational Research, Medical University of Vienna, Vienna, 1090, Austria; elisa.einwallner@meduniwien.ac.at

\* Correspondence: michael.trauner@meduniwien.ac.at; Tel.: +43-140-4004-7410; Fax: +43-14-0400-4735

## Table of Contents:

- Supporting Materials and Methods
- Supporting Figure and Figure Legends

## Supporting Materials and Methods:

### *RT-PCR analysis:*

RNA was isolated from primary HSCs and LX-2 by NucleoSpin® RNA (MACHEREY-NAGEL GmbH & Co., Germany) according to manufacturer's instructions. One µg of RNA was reverse transcribed using Moloney Murine Leukemia Virus enzyme, 10xbuffer for cDNA synthesis and Deoxynucleotide Mix 10mM (Sigma-Aldrich). Two microliters of diluted cDNA were loaded together with SYBR® Select Master Mix on 96 well-plate to perform RT-PCR analysis (Thermo Fisher Scientific). Forward and reverse primers for each gene of interest were specifically designed and used at 10 pmol/µL (Eurofins Genomics, Germany). Sequences are available upon request.

## Supporting Figure and Figure Legend:

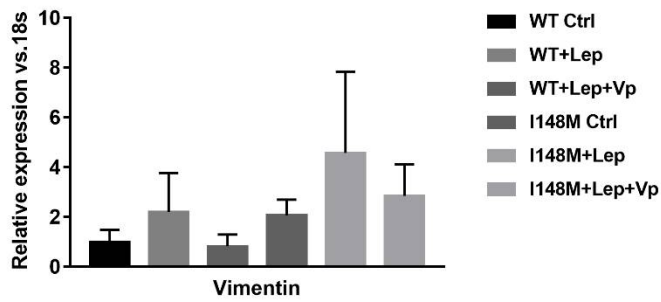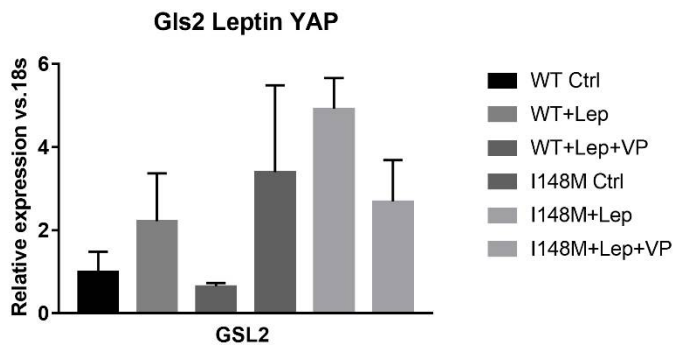

**Supp. Fig.1. Verteporfin inhibits Leptin mediated Hedgehog/Yap target gene expression.** LX-2 stably overexpressing cells ( $n = 3$  each PNPLA3 genotype) obtained and cultivated in vitro, as described in Materials & Methods. Where indicated, cells were stimulated with Vp and Leptin (Lep) respectively for 24h and 1h prior the analysis. Expression of Vimentin and GLS2 analyzed by real-time PCR and normalized to 18s.
